# Supplementary material for: Airborne Pathogens in a Heterogeneous World: Superspreading & Mitigation
Source: bioRxiv or medRxiv preprint supplement (doi:10.1101/2020.10.24.20218784), 2020-10-27
Supplement: Supplementary file [file media-1.pdf]

## Supplemental Information

Julius B. Kirkegaard, Joachim Mathiesen, and Kim Sneppen  
*Niels Bohr Institute, University of Copenhagen, 2100 Copenhagen, Denmark*  
 (Dated: October 24, 2020)

### Distribution

Marginalizing over

$$P_N(n) = (\beta - 1) \frac{a^{\beta-1}}{(a+n)^\beta} \quad (1)$$

$$P_{Z_i}(z) = \frac{(\alpha n)^z e^{-\alpha n}}{z!} \quad (2)$$

gives

$$P_Z(z) = \frac{(\beta - 1)a^{\beta-1}}{z!} \int_0^\infty \frac{(\alpha n)^z e^{-\alpha n}}{(a+n)^\beta} dn \equiv \frac{(\beta - 1)a^{\beta-1}}{z!} f(z, \beta). \quad (3)$$

We only need the integral for integer values of  $z$ , so we may do the calculation recursively:

$$\begin{aligned} f(z+1, \beta) &= \int_0^\infty \frac{(\alpha n)^{z+1} e^{-\alpha n}}{(a+n)^\beta} \\ &= \alpha \int_0^\infty \frac{n(\alpha n)^z e^{-\alpha n}}{(a+n)^\beta} \\ &= \alpha \left[ \int_0^\infty \frac{(a+n)(\alpha n)^z e^{-\alpha n}}{(a+n)^\beta} - a \int_0^\infty \frac{(\alpha n)^z e^{-\alpha n}}{(a+n)^\beta} \right] \\ &= \alpha \left[ \int_0^\infty \frac{(\alpha n)^z e^{-\alpha n}}{(a+n)^{\beta-1}} - a \int_0^\infty \frac{(\alpha n)^z e^{-\alpha n}}{(a+n)^\beta} \right] \\ &= \alpha [f(z, \beta - 1) - a f(z, \beta)]. \end{aligned} \quad (4)$$

With this recursion, all values  $0 \leq z \leq n$  can be calculated in  $\mathcal{O}(n^2)$  evaluations if we know  $f(0, \beta)$ . Luckily this integral is much simpler:

$$f(0, \beta) = e^{a\alpha} \alpha^{\beta-1} \Gamma(1 - \beta, a\alpha) = e^{a\alpha} a^{1-\beta} E_\beta(a\alpha), \quad (5)$$

where  $\Gamma(\cdot, \cdot)$  is the incomplete gamma function and  $E_n(\cdot)$  is the exponential integral function. Finally we solve the recursion to obtain the result of the main text.

### Exponential Distribution

When the method of disease transmission is by physical touch, the exponential distribution becomes more relevant. Taking

$$P_N(n) = s^{-1} e^{-n/s} \quad (6)$$

we find

$$P_{Z_i}(z) = (\alpha s)^z (1 + \alpha s)^{-(z+1)}. \quad (7)$$

In this case we can directly solve for the distribution for any  $M$ . Calculating the probability generating function, we find

$$G_{Z_i}(\zeta) = \frac{1}{1 + \alpha s(1 - \zeta)}. \quad (8)$$

We raise this to the  $M$ -th power and take  $z$  derivatives to find

$$P_Z(z) = \binom{M+z-1}{z} \frac{(\alpha s)^z}{(1+\alpha s)^{M+z}}. \quad (9)$$

This has average  $\alpha Ms$ , which for fixed  $R_0$  implies  $\alpha = R_0/(sM)$ . Thus the distribution is independent of  $s$  for fixed  $R_0$ :

$$P_Z(z) = \binom{M+z-1}{z} \frac{(R_0/M)^z}{(1+R_0/M)^{M+z}}. \quad (10)$$

This is a negative binomial distribution,  $\text{NB}(M, (1+R_0/M)^{-1})$ . It corresponds to the superspreading distribution of Ref. [1] if one identifies their dispersion parameter  $k$  with  $M$ . The correspondence arises because the sum of  $M$  exponentially distributed random numbers is gamma distributed and the sum of Poisson distributed random numbers is itself Poisson distributed.

Since the distribution is independent of  $s$ , so be its output statistics. In particular, the above distribution gives  $f_{20} \approx 0.60$  for  $M = 1$  and  $R_0 = 2.0$ , whereas we have  $f_{20} \approx 0.65$  for  $R_0 = 1.0$ . For  $M = 5$  the fractions fall to  $f_{20} \approx 0.46$  ( $R_0 = 2.0$ ) and  $f_{20} \approx 0.54$  ( $R_0 = 1.0$ ). Since these are valid for all  $s$ , we conclude that extreme statistics such as 20 % infecting 80 % can never be achieved from exponential distributions.

### Mitigation

For mitigation we redistribute people below a maximum  $n = x$ . So we have

$$P_N(n) = \frac{1}{\int_0^x \frac{1}{(a+n)^\beta} dn} \frac{1}{(a+n)^\beta} \equiv \frac{1}{N(a, \beta, x)} \frac{1}{(a+n)^\beta} \quad (11)$$

where the normalization is a simple, but ugly integral. We now need

$$P_Z(z) = \frac{1}{z!N(a, \beta, x)} \int_0^x \frac{(\alpha n)^z e^{-\alpha n}}{(a+n)^\beta} dn \equiv \frac{1}{z!N(a, \beta, x)} f_x(z, \beta). \quad (12)$$

By the exact same argument as above, we have

$$f_x(z+1, \beta) = \alpha [f_x(z, \beta-1) - a f_x(z, \beta)]. \quad (13)$$

Again we need the value for  $z = 0$ , which in this case is

$$f_x(0, \beta) = e^{a\alpha} \alpha^{\beta-1} (\Gamma(1-\beta, a\alpha) - \Gamma(1-\beta, (a+x)\alpha)). \quad (14)$$

### Exponential Cutoff

We use a power law for the distribution of sizes of location. This creates two problems: (1) the model becomes invalid as  $\beta \rightarrow 2$  and (2) higher order moments diverge. To fix these issues an exponential cutoff must be included. In this case we consider

$$P_N(n) = \frac{a^{\beta-1}}{E_\beta(a/s)} \frac{e^{-\frac{a+n}{s}}}{(a+n)^\beta}, \quad (15)$$

where  $s$  denotes the (soft) cutoff value. Now we have

$$P_Z(z) = \frac{a^{\beta-1}}{z!E_\beta(a/s)} \int_0^\infty \frac{(\alpha n)^z e^{-\alpha n} e^{-\frac{a+n}{s}}}{(a+n)^\beta} dn \equiv \frac{a^{\beta-1}}{z!E_\beta(a/s)} f_s(z, \beta), \quad (16)$$

and again

$$f_s(z+1, \beta) = \alpha [f_s(z, \beta-1) - a f_s(z, \beta)], \quad (17)$$

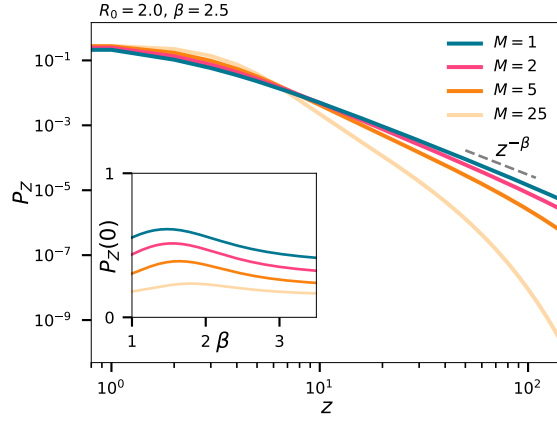FIG. 1. Same as main text, but with exponential cutoff  $s = 1,000$ .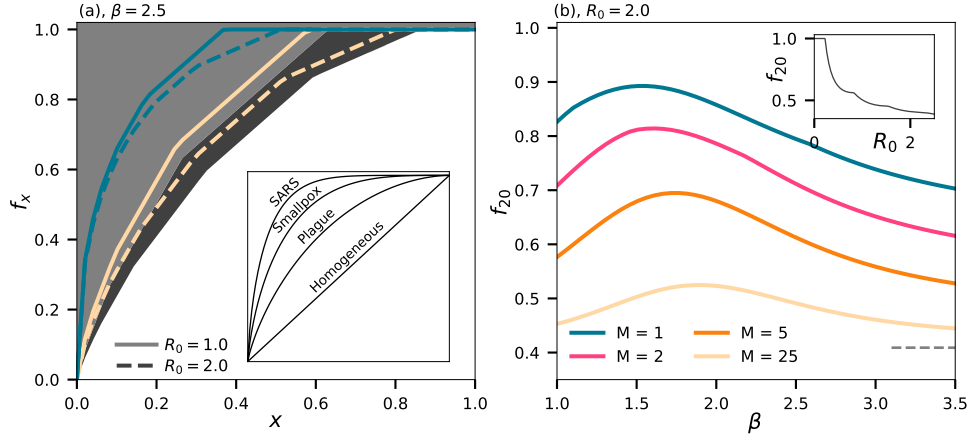FIG. 2. Same as main text, but with exponential cutoff  $s = 1,000$ .

where now

$$f_s(0, \beta) = e^{a\alpha} a^{1-\beta} E_\beta(a\alpha + as^{-1}). \quad (18)$$

Solving this recursion leads to

$$P_Z(z) = \frac{(-a\alpha)^z e^{a\alpha}}{z! E_\beta(a/s)} \sum_{j=0}^z (-1)^j \binom{z}{j} E_{\beta-j}(a\alpha + as^{-1}). \quad (19)$$

For  $\beta \geq 1$ , we have  $1/E_\beta(0) = (\beta - 1)$ , confirming that this result reduces to that of the main text for  $s \rightarrow \infty$ . Note that for  $s$  finite, we no longer need to require  $\beta > 2.0$ . Fig. 3 shows the plot  $f_{20}$  with an exponential cutoff. We note that the values of  $\beta = 2.5$  are virtually unchanged. Interestingly, the curves now yield a maximum. Thus, with a cutoff, the superspreading statistics emerging from spatial heterogeneity can be bounded even if  $\beta$  is unknown.

### Mitigation & Exponential Cutoff

We now have

$$P_N(n) = \frac{1}{\int_0^x \frac{e^{-n/s}}{(a+n)^\beta} dn} \frac{e^{-n/s}}{(a+n)^\beta} \equiv \frac{1}{N(a, \beta, x)} \frac{e^{-n/s}}{(a+n)^\beta}. \quad (20)$$

As before this leads us to

$$P_Z(z) = \frac{1}{z! N(a, \beta, x)} \int_0^x \frac{(\alpha n)^z e^{-n/s} e^{-\alpha n}}{(a+n)^\beta} dn \equiv \frac{1}{z! N(a, \beta, x)} f_x(z, \beta). \quad (21)$$

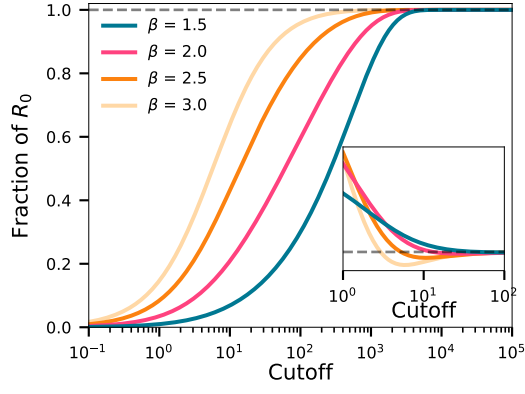

FIG. 3. Same as main text, but with exponential cutoff  $s = 1,000$ .

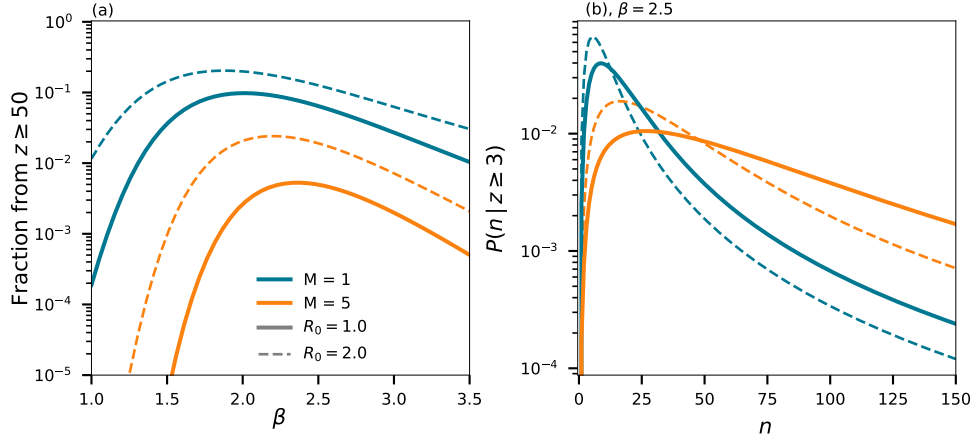

FIG. 4. Same as main text, but with exponential cutoff  $s = 1,000$ .

By the exact same argument as above, we have

$$f_x(z+1, \beta) = \alpha [f_x(z, \beta-1) - \alpha f_x(z, \beta)]. \quad (22)$$

Again we need the value for  $z = 0$ , which in this case is

$$f_x(0, \beta) = \frac{s(\alpha + s^{-1})^\beta e^{a\alpha + as^{-1}}}{1 + \alpha s} [\Gamma(1 - \beta, a\alpha + as^{-1}) - \Gamma(1 - \beta, (a+x)(1+s\alpha)s^{-1})]. \quad (23)$$

- 
- [1] J. O. Lloyd-Smith, S. J. Schreiber, P. E. Kopp and W. M. Getz. Superspreading and the effect of individual variation on disease emergence. *Nature*, 438, 355–35, 2005.
